# Supplementary material for: Development of Water-Compatible Molecularly Imprinted Polymers Based on Functionalized β-Cyclodextrin for Controlled Release of Atropine
Source: Polymers (Basel). 2020 Jan 6;12(1):130. doi: 10.3390/polym12010130 (PMC7022701; doi:10.3390/polym12010130)
Supplement: Supplementary file 1 [file polymers-12-00130-s001.pdf]

## **Electronic Supporting Material**

**Development of water-compatible molecularly imprinted polymers based on functionalized  $\beta$ -cyclodextrin for controlled release of atropine**

**Yahui He<sup>a,b,\*</sup>, Shaomei Zeng<sup>b</sup>, A. M. Abd El-Aty<sup>c,d,e,\*</sup>, Ahmet Hacımüftüoğlu<sup>e</sup>, Woldemariam Kalekristos Yohannes<sup>a</sup>, Majid Khan<sup>a</sup>, Yongxin She<sup>b,\*</sup>**

*<sup>a</sup>Beijing Technology and Business University, Beijing 100048, P.R. China*

*<sup>b</sup>Institute of Quality Standards & Testing Technology for Agro-Products, Chinese Academy of Agricultural Sciences, Beijing 100081, P.R. China*

*<sup>c</sup>State Key Laboratory of Biobased Material and Green Papermaking, College of Food Science and Engineering, Qilu University of Technology, Shandong Academy of Science, Jinan 250353, China*

*<sup>d</sup>Department of Pharmacology, Faculty of Veterinary Medicine, Cairo University, 12211-Giza, Egypt*

*<sup>e</sup>Department of Medical Pharmacology, Medical Faculty, Ataturk University, 25240-Erzurum, Turkey*

**\*Correspondence:** [hyh@btbu.edu.cn](mailto:hyh@btbu.edu.cn) (Y.H.); [abdelaty44@hotmail.com](mailto:abdelaty44@hotmail.com) (A. M. Abd El-Aty), [sheyongxin@caas.cn](mailto:sheyongxin@caas.cn) (Y.S.).

Table S1 Comparison of the performance of the developed MIP in the present study and some releasing MIP reported in literature.

| MIP for targets           | Functional Monomer | Qm (mg·g <sup>-1</sup> ) | Drug release rate (%/24h) | Release environment | Ref.                        |
|---------------------------|--------------------|--------------------------|---------------------------|---------------------|-----------------------------|
| Vancomycin                | DEAEMA             | 17                       | 80                        | 5.2 and 7.4         | Mao, et al. (2017)          |
| Doxorubicin hydrochloride | MAA                | 166.28                   | 50                        | 7.4                 | (Chen, et al. (2016)        |
| Azithromycin              | MAA                | 127                      | 24                        | 7.4                 | (Sheybani, et al. (2015)    |
| Dichlorophenol            | MAA-β-CD           | 45.67                    | -                         | -                   | (Surikumaran, et al. (2014) |
| Sinomenine hydrochloride  | MAA+β-CD           | 93.8                     | 78                        | 7.4                 | (Chen, .et al. (2018))      |
| Atropine                  | MAA-β-CD           | 240                      | 65                        | 1.5 and 7.4         | This work                   |

## References

Congyang Mao , Xianzhou Xie , Xiangmei Liu , Zhenduo Cui , Xianjin Yang , K.W.K. Yeung , Haobo Pan, Paul K. Chu , Shuilin Wu.The controlled drug release by pH-sensitive molecularly imprinted nanospheres for enhanced antibacterial activity. *Materials Science and Engineering C* 77 (2017) 84–91.

Fangfang Chen, Heng Chen, Xiao Duan, Jiqiong Jia, and Jie Kong.Molecularly imprinted polymers synthesized using reduction-cleavable hyperbranched polymers for doxorubicin hydrochloride with enhanced loading properties and controlled release.*J Mater Sci* (2016) 51:9367–9383.

Simin Sheybani, Tolou Hosseinifar, Majid Abdoussand Saeedeh Mazinani .Mesoporous molecularly imprinted polymer nanoparticles as a sustained release system of azithromycin.*RSC Adv.*, 2015, 5, 98880–98891.

Hemavathy Surikumaran, Sharifah Mohamad \* and Norazilawati Muhamad Sarih.Molecular Imprinted Polymer of Methacrylic Acid Functionalised  $\beta$ -Cyclodextrin for Selective Removal of 2,4-Dichlorophenol.*Int. J. Mol. Sci.* 2014, 15, 6111-6136.

Hanqiu Chen, Wen Zhang, Ning Yang, Chongmin Chen, Mingliang Zhang.Chitosan-Based Surface Molecularly Imprinted Polymer Microspheres for Sustained Release of Sinomenine Hydrochloride in Aqueous Media.*Appl Biochem Biotechnol* (2018) 185:370–384.
